# Supplementary material for: Genotype-Environment Interaction Shapes the Microbial Assemblage in Grapevine’s Phyllosphere and Carposphere: An NGS Approach
Source: PubMed Central journal article supplement (PMC6313654; doi:10.3390/microorganisms6040096), 2018-09-21
Supplement: microorganisms-06-00096-s001.pdf [file microorganisms-06-00096-s001.pdf]

**Supplementary Table S1a: Differentially abundant bacterial genera between Leaf and Berries**

| <u>OTUs</u> | <u>Genus</u>              | <u>Corrected P-values</u> | <u>FDRs</u> |
|-------------|---------------------------|---------------------------|-------------|
| OTU94       | <i>Geodermatophilus</i>   | 0.0060                    | 0.00066     |
| OTU428      | <i>Kineococcus</i>        | 0.0060                    | 0.00066     |
| OTU903      | <i>Hymenobacter</i>       | 0.0060                    | 0.00066     |
| OTU152      | <i>Arthrobacter</i>       | 0.0060                    | 0.00066     |
| OTU39       | <i>Paenisporosarcina</i>  | 0.0060                    | 0.00066     |
| OTU288      | <i>Paenibacillus</i>      | 0.0060                    | 0.00066     |
| OTU101      | <i>Microbacterium</i>     | 0.0060                    | 0.00066     |
| OTU460      | <i>Planifilum</i>         | 0.0060                    | 0.00066     |
| OTU200      | <i>Methylobacterium</i>   | 0.0060                    | 0.00066     |
| OTU72       | <i>Cutibacterium</i>      | 0.0060                    | 0.00066     |
| OTU134      | <i>Nocardioides</i>       | 0.0060                    | 0.00066     |
| OTU415      | <i>Noviherbaspirillum</i> | 0.0060                    | 0.00066     |
| OTU56       | <i>Massilia</i>           | 0.0060                    | 0.00066     |
| OTU374      | <i>Adhaeribacter</i>      | 0.0060                    | 0.00066     |
| OTU26       | <i>Gluconobacter</i>      | 0.0060                    | 0.00066     |
| OTU451      | <i>Roseomonas</i>         | 0.0117                    | 0.00123     |
| OTU897      | <i>Streptococcus</i>      | 0.0172                    | 0.00174     |
| OTU193      | <i>Domibacillus</i>       | 0.0278                    | 0.00275     |
| OTU849      | <i>Tumebacillus</i>       | 0.0329                    | 0.00312     |
| OTU211      | <i>Actinomycetospora</i>  | 0.0426                    | 0.00396     |

**Supplementary Table S1b:** Differentially abundant fungal genera between Leaf and Berries

| <b>OTUs</b> | <b>Genus</b>              | <b>Species</b>        | <b>Corrected P-values</b> | <b>FDRs</b>  |
|-------------|---------------------------|-----------------------|---------------------------|--------------|
| OTU2        | <i>g_Alternaria</i>       | <i>s_alternata</i>    | 0.0021                    | 0.0003764706 |
| OTU4        | <i>g_Cladosporium</i>     | <i>s_delicatulum</i>  | 0.0021                    | 0.0003764706 |
| OTU33       | <i>g_Sporobolomyces</i>   | <i>s_roseus</i>       | 0.0021                    | 0.0003764706 |
| OTU18       | <i>g_Sporobolomyces</i>   | <i>s_roseus</i>       | 0.0021                    | 0.0003764706 |
| OTU62       | <i>g_Aureobasidium</i>    | <i>s_pullulans</i>    | 0.0021                    | 0.0003764706 |
| OTU49       | <i>g_Rhodotorula</i>      | <i>s_babjevae</i>     | 0.0021                    | 0.0003764706 |
| OTU11       | <i>g_Filobasidium</i>     | <i>s_magnum</i>       | 0.0021                    | 0.0003764706 |
| OTU12       | <i>g_Alternaria</i>       | <i>s_alternata</i>    | 0.0021                    | 0.0003764706 |
| OTU32       | <i>g_Sporormia</i>        | NA                    | 0.0021                    | 0.0003764706 |
| OTU19       | <i>g_Alternaria</i>       | <i>s_alternata</i>    | 0.0021                    | 0.0003764706 |
| OTU79       | <i>g_Rhodotorula</i>      | <i>s_babjevae</i>     | 0.0021                    | 0.0003764706 |
| OTU61       | <i>g_Quambalaria</i>      | <i>s_cyanescens</i>   | 0.0021                    | 0.0003764706 |
| OTU83       | <i>g_Metschnikowia</i>    | <i>s_pulcherrima</i>  | 0.0021                    | 0.0003764706 |
| OTU73       | <i>g_Metschnikowia</i>    | <i>s_pulcherrima</i>  | 0.0021                    | 0.0003764706 |
| OTU96       | <i>g_Metschnikowia</i>    | <i>s_pulcherrima</i>  | 0.0021                    | 0.0003764706 |
| OTU35       | <i>g_Citeromyces</i>      | <i>s_matritensis</i>  | 0.0021                    | 0.0003764706 |
| OTU70       | <i>g_Acaromyces</i>       | <i>s_ingoldii</i>     | 0.0021                    | 0.0003764706 |
| OTU5        | <i>g_Aureobasidium</i>    | <i>s_pullulans</i>    | 0.0041                    | 0.0006736842 |
| OTU97       | <i>g_Metschnikowia</i>    | <i>s_pulcherrima</i>  | 0.0041                    | 0.0006736842 |
| OTU136      | <i>g_Cryptococcus</i>     | <i>s_heimaeyensis</i> | 0.0123                    | 0.00192      |
| OTU71       | <i>g_Filobasidium</i>     | <i>s_stepposum</i>    | 0.0154                    | 0.0024380952 |
| OTU108      | <i>g_Metschnikowia</i>    | <i>s_pulcherrima</i>  | 0.0176                    | 0.0026181818 |
| OTU51       | <i>g_Filobasidium</i>     | <i>s_magnum</i>       | 0.0187                    | 0.0027826087 |
| OTU85       | <i>g_Saccharomycopsis</i> | <i>s_vini</i>         | 0.0243                    | 0.0034666667 |
| OTU34       | <i>g_Botrytis</i>         | <i>s_caroliniana</i>  | 0.0337                    | 0.0044307692 |
| OTU52       | <i>g_Rhizopus</i>         | <i>s_arrhizus</i>     | 0.0337                    | 0.0044307692 |

**Supplementary Table S2a:** Differentially abundant bacterial genera among three climate zones

| OTUs   | Genus                        | Corrected <i>P</i> -values | FDRs        |
|--------|------------------------------|----------------------------|-------------|
| OTU29  | <i>Modestobacter</i>         | 0.0032                     | 0.003833333 |
| OTU87  | <i>Microvirga</i>            | 0.0032                     | 0.003833333 |
| OTU114 | <i>Rubellimicrobium</i>      | 0.0032                     | 0.003833333 |
| OTU66  | <i>Friedmanniella</i>        | 0.0032                     | 0.003833333 |
| OTU161 | <i>Craurococcus</i>          | 0.0032                     | 0.003833333 |
| OTU271 | <i>Neorhizobium</i>          | 0.0032                     | 0.003833333 |
| OTU55  | <i>Paracoccus</i>            | 0.0063                     | 0.0046      |
| OTU50  | <i>Blastococcus</i>          | 0.0063                     | 0.0046      |
| OTU61  | <i>Kocuria</i>               | 0.0063                     | 0.0046      |
| OTU113 | <i>Rathayibacter</i>         | 0.0063                     | 0.0046      |
| OTU1   | <i>Sphingomonas</i>          | 0.0114                     | 0.008363636 |
| OTU218 | <i>Paenisporosarcina</i>     | 0.0143                     | 0.009583333 |
| OTU7   | <i>Ralstonia</i>             | 0.0246                     | 0.012266667 |
| OTU124 | <i>Kocuria</i>               | 0.0246                     | 0.012266667 |
| OTU250 | <i>Deinococcus</i>           | 0.0246                     | 0.012266667 |
| OTU279 | <i>Devosia</i>               | 0.0269                     | 0.0129375   |
| OTU45  | <i>Methylobacterium</i>      | 0.029                      | 0.013529412 |
| OTU11  | <i>Rickettsiella</i>         | 0.0358                     | 0.016611111 |
| OTU14  | <i>Pseudoarthobacter</i>     | 0.0032                     | 0.00328     |
| OTU171 | <i>Acinetobacter</i>         | 0.0032                     | 0.00328     |
| OTU262 | <i>Chamaesiphon_PCC-7430</i> | 0.0032                     | 0.00328     |
| OTU102 | <i>Rubellimicrobium</i>      | 0.0032                     | 0.003285714 |
| OTU152 | <i>Pleurocapsa_PCC-7319</i>  | 0.0058                     | 0.00575     |
| OTU333 | <i>Aliterella_CENA595</i>    | 0.0111                     | 0.010222222 |
| OTU57  | <i>Methylobacterium</i>      | 0.0033                     | 0.003833333 |
| OTU30  | <i>Skermanella</i>           | 0.0054                     | 0.00575     |
| OTU42  | <i>1174-901-12</i>           | 0.012                      | 0.0115      |
| OTU72  | <i>Staphylococcus</i>        | 0.012                      | 0.0115      |
| OTU95  | <i>Snodgrassella</i>         | 0.0112                     | 0.012545455 |
| OTU29  | <i>Modestobacter</i>         | 0.019                      | 0.013416667 |
| OTU55  | <i>Paracoccus</i>            | 0.0237                     | 0.015923077 |

**Supplementary Table S2b:** Differentially abundant fungal genera among three climate zones

| OTUs   | Genus                    | Corrected P-values | FDRs        |
|--------|--------------------------|--------------------|-------------|
| OTU30  | <i>g__Sporobolomyces</i> | 0.0019             | 0.00158     |
| OTU3   | <i>g__Alternaria</i>     | 0.0019             | 0.00158     |
| OTU54  | <i>g__Sporobolomyces</i> | 0.0019             | 0.00158     |
| OTU34  | <i>g__Ascochyta</i>      | 0.0019             | 0.00158     |
| OTU9   | <i>g__Cryptococcus</i>   | 0.0019             | 0.00158     |
| OTU66  | <i>g__Hyperphyscia</i>   | 0.0084             | 0.005266667 |
| OTU1   | <i>g__Aureobasidium</i>  | 0.0166             | 0.0079      |
| OTU8   | <i>g__Stemphylium</i>    | 0.0231             | 0.009875    |
| OTU37  | <i>g__Filobasidium</i>   | 0.0285             | 0.011411111 |
| OTU61  | <i>g__Ganoderma</i>      | 0.0313             | 0.01185     |
| OTU9   | <i>g__Cryptococcus</i>   | 0.0014             | 0.0009875   |
| OTU31  | <i>g__Stigmina</i>       | 0.0014             | 0.0009875   |
| OTU6   | <i>g__Cladosporium</i>   | 0.0014             | 0.0009875   |
| OTU73  | <i>g__Aureobasidium</i>  | 0.0014             | 0.0009875   |
| OTU39  | <i>g__Symmetrospora</i>  | 0.0047             | 0.002633333 |
| OTU56  | <i>g__Coprinopsis</i>    | 0.0097             | 0.004253846 |
| OTU62  | <i>g__Aspergillus</i>    | 0.0138             | 0.004253846 |
| OTU115 | <i>g__Exophiala</i>      | 0.0138             | 0.004253846 |
| OTU21  | <i>g__Ustilago</i>       | 0.0165             | 0.005078571 |
| OTU16  | <i>g__Alternaria</i>     | 0.0159             | 0.0069125   |
| OTU17  | <i>g__Chalastospora</i>  | 0.0286             | 0.010772727 |

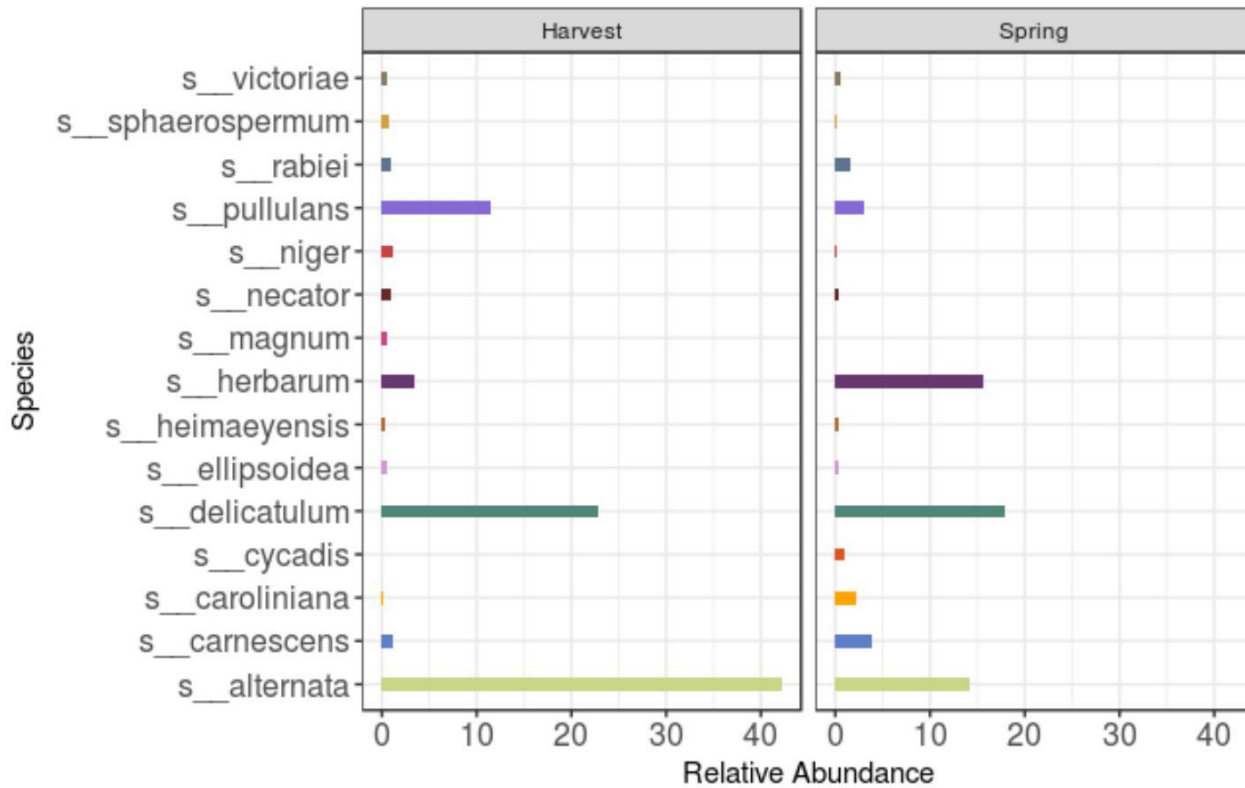

**Supplementary Figure S1.** Relative Abundance major species between two season, displaying the uniqueness of the fungal microbiome structure at Spring and Harvest season.

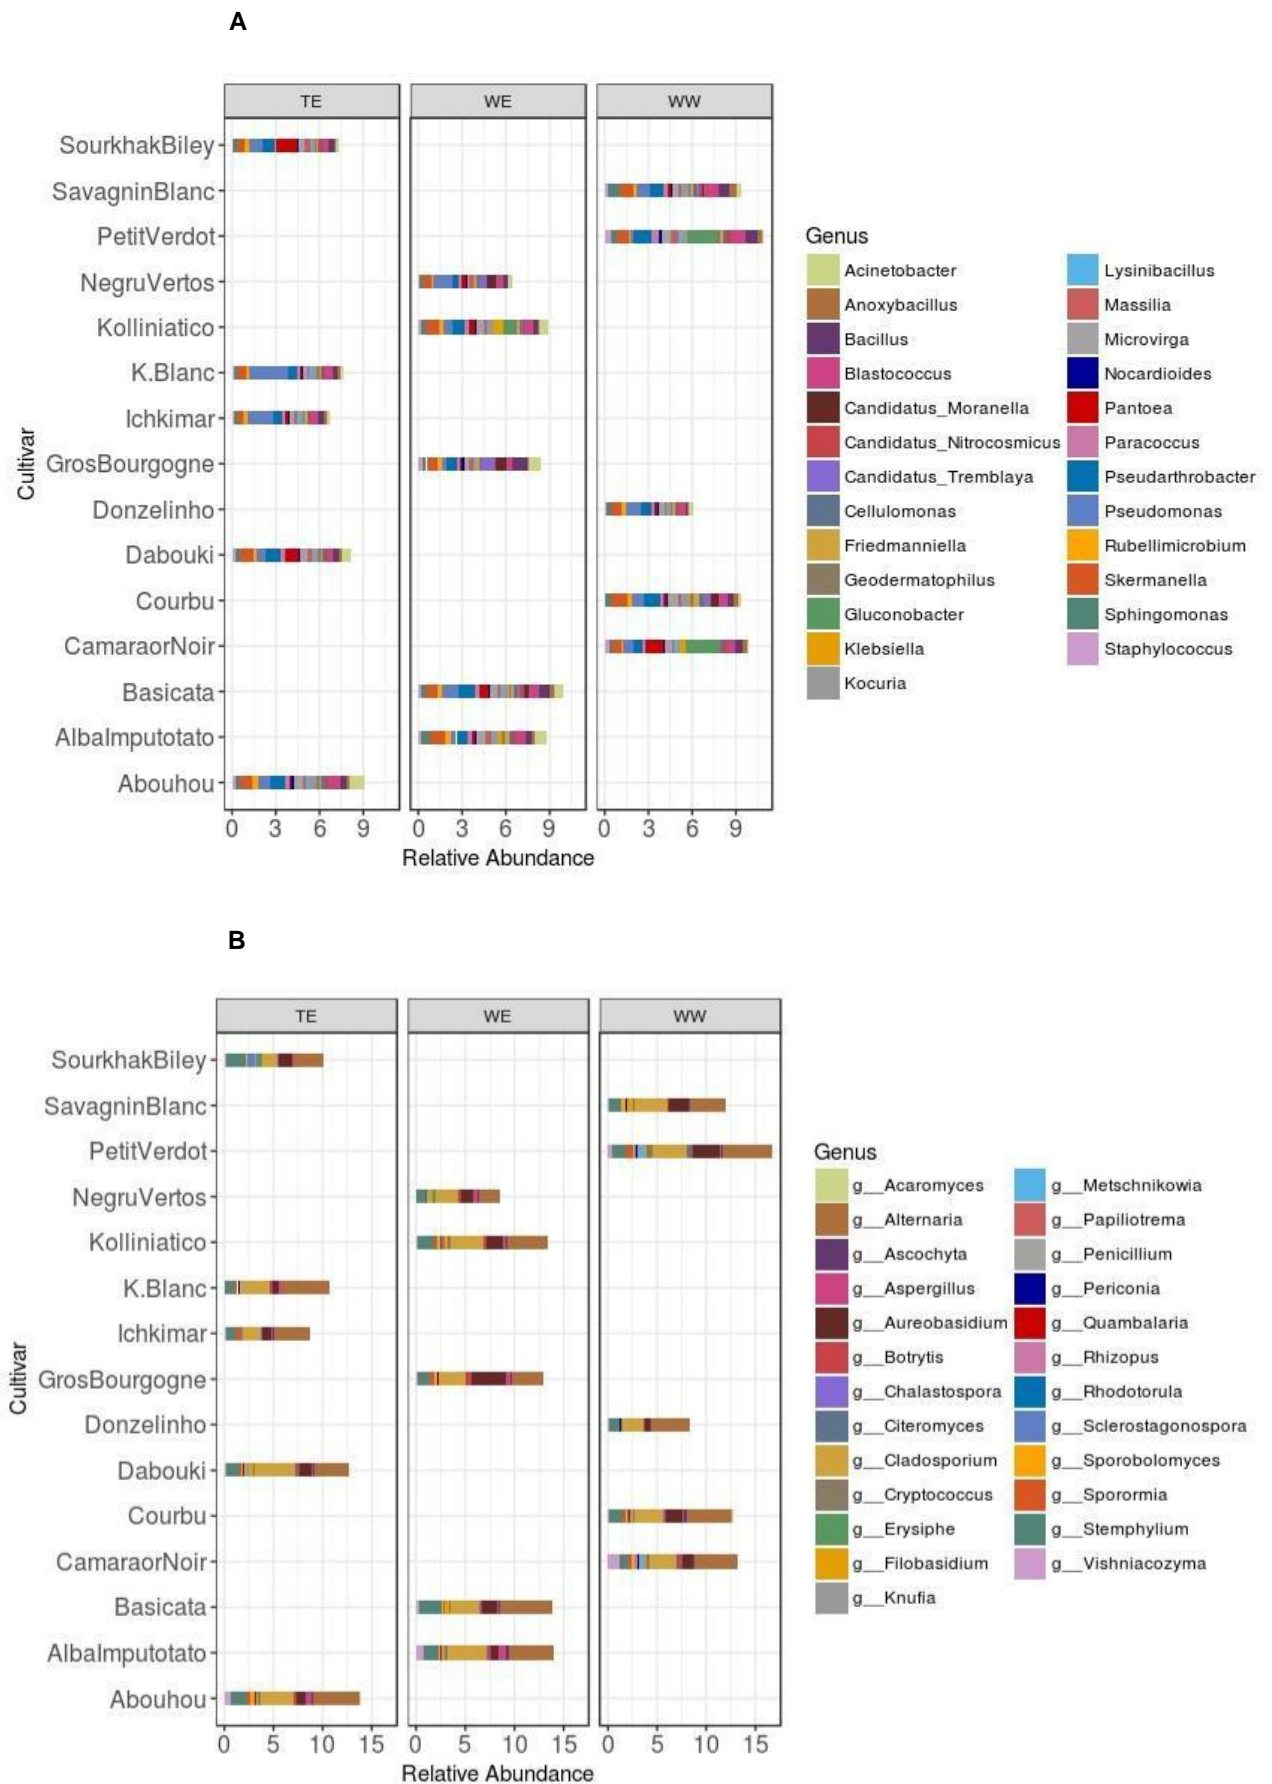

**Supplementary Fig S2.** Relative abundances of major (A) bacterial and (B) fungal taxa (top 25, at genus level) of each cultivar (grouped in three genetic pools). Set1. N = 213.

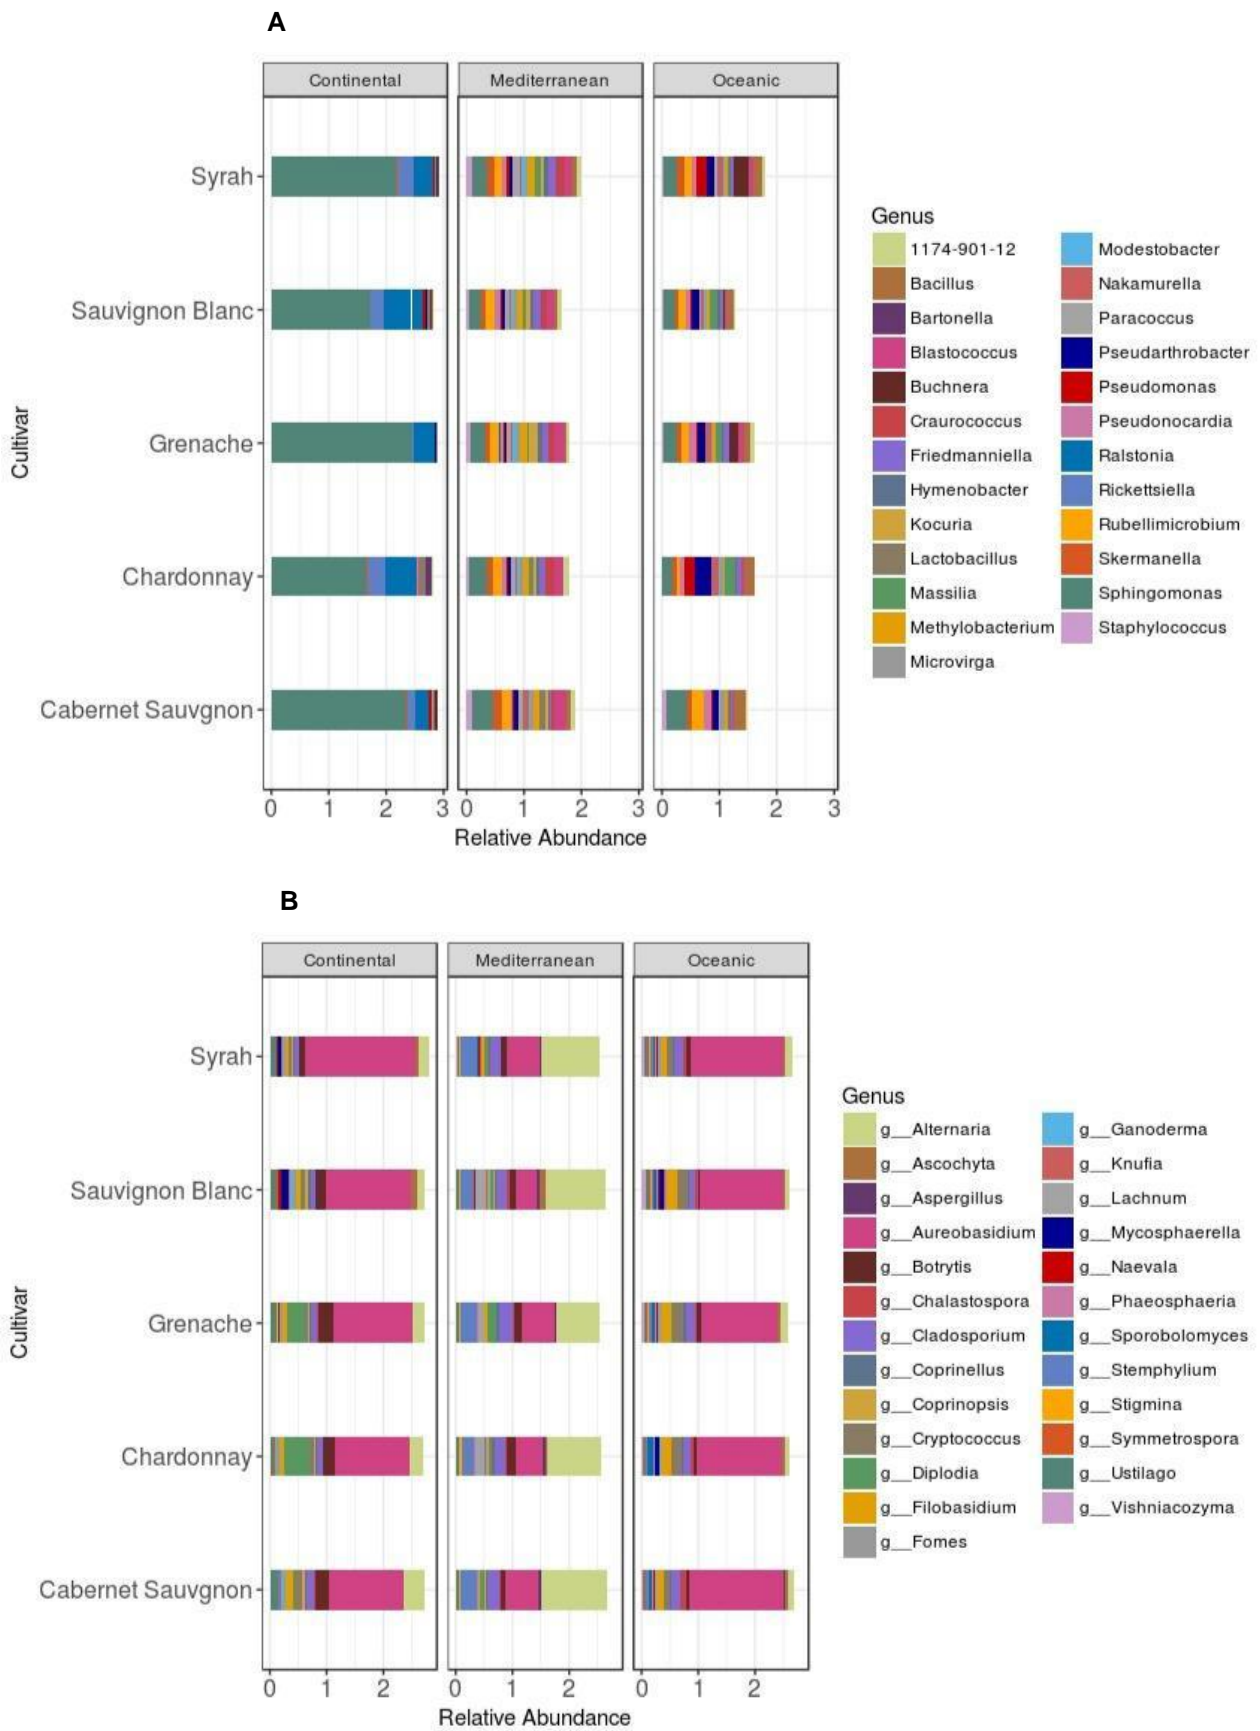

**Supplementary Fig S3.** Relative abundances of major (A) bacterial and (B) fungal taxa (top 25, at genus level) of each cultivar (grouped in three geographic locations). Set2. N = 45.
